# Supplementary material for: Vitamin D and Diseases of Mineral Homeostasis: A Cyp24a1 R396W Humanized Preclinical Model of Infantile Hypercalcemia Type 1
Source: MDPI journal article supplement (doi:10.3390/nu14153221), 2022-08-06
Supplement: s1 [file s1]

## SUPPLEMENTARY FIGURES

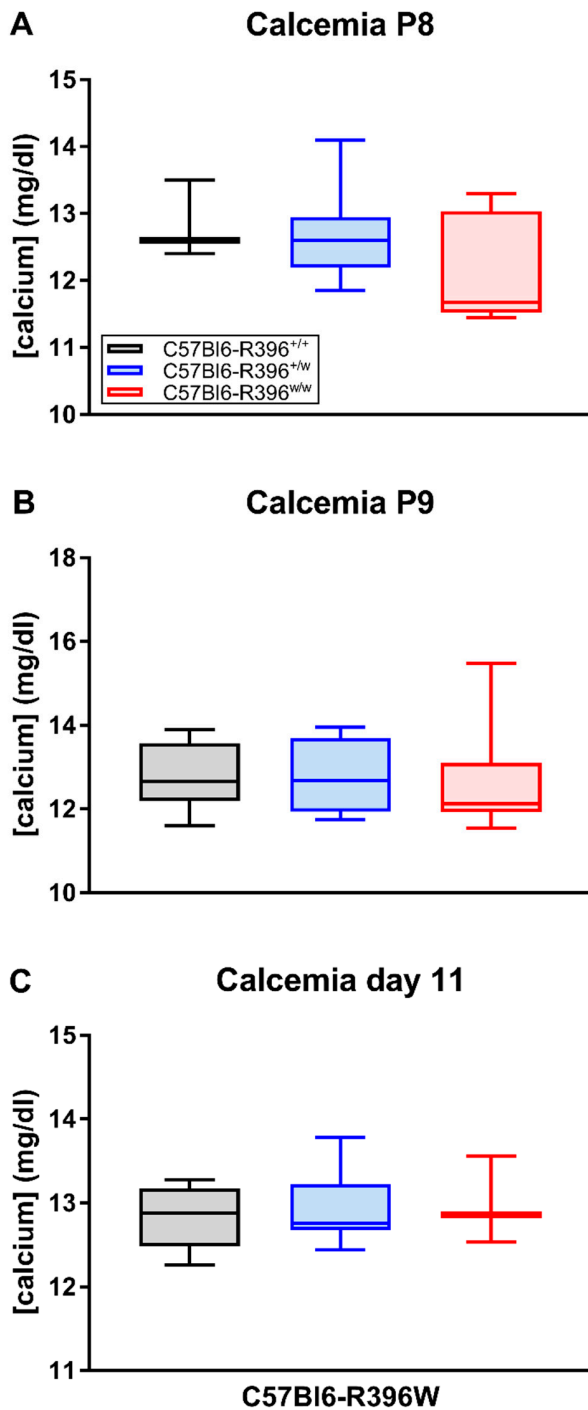

**Supplementary Figure S1.** Serum calcium levels in C57Bl6-R396W littermates. Total serum calcium was measured using an automated analyzer. A, postnatal day 8; B, postnatal day 9; C, postnatal day 11. No statistical differences by one-way ANOVA.

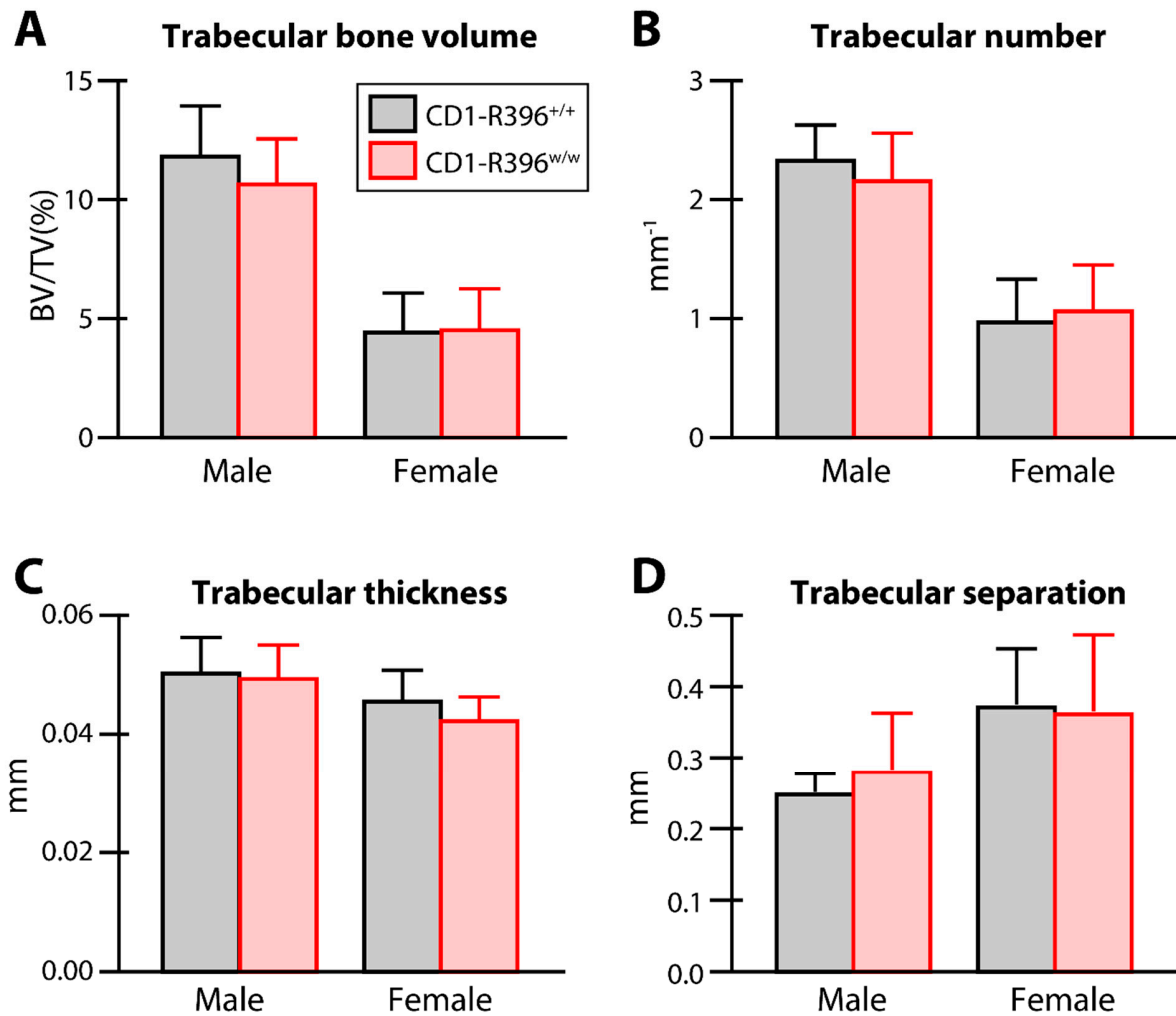

**Supplementary Figure S2.** Steady-state trabecular parameters in CD1-R396W knock-in strain. Tibiae from mutant and wild-type littermates of both sexes were analyzed by  $\mu$ CT at 3 months of age.

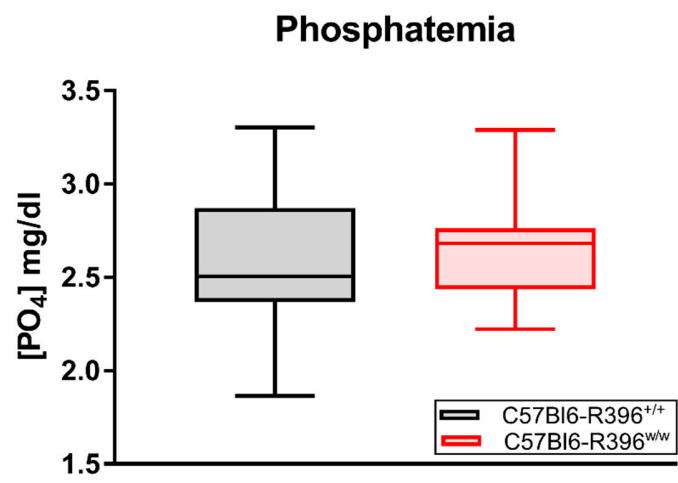

**Supplementary Figure S3.** Serum phosphate levels in surviving wild-type and mutant C57Bl6-R396W mice at 3 months of age.
